# Supplementary material for: Shotgun Redox Proteomics: Identification and Quantitation of Carbonylated Proteins in the UVB-Resistant Marine Bacterium, Photobacterium angustum S14
Source: PubMed Central journal article supplement (PMC3706606; doi:10.1371/journal.pone.0068112), 2013-07-09
Supplement: pone.0068112.s001.pdf [file pone.0068112.s001.pdf]

**Table S1.** Carbonylated proteins labeled with biotin identified from UVB treated cells (141 proteins).

| Proteins name                                                              | COG  | Protein score | *Nb of peptides | Sequence of carbonylated peptides |
|----------------------------------------------------------------------------|------|---------------|-----------------|-----------------------------------|
| VAS14_07124 molecular chaperone DnaK                                       | O    | 2662          | 64              |                                   |
| VAS14_20961 elongation factor Ts                                           | J    | 2111          | 43              |                                   |
| VAS14_18544 30S ribosomal protein S1                                       | J    | 2012          | 57              |                                   |
| VAS14_06218 trigger factor                                                 | O    | 1389          | 27              |                                   |
| VAS14_09609 hypothetical protein                                           | /    | 1273          | 29              |                                   |
| VAS14_02983 putative Cold shock-like protein                               | K    | 1089          | 13              |                                   |
| VAS14_19171 50S ribosomal protein L1                                       | J    | 1054          | 21              |                                   |
| VAS14_20441 phosphopyruvate hydratase                                      | G    | 1025          | 24              |                                   |
| VAS14_19336 DNA-directed RNA polymerase alpha subunit                      | K    | 949           | 27              |                                   |
| VAS14_19161 50S ribosomal protein L7/L12                                   | J    | 912           | 27              |                                   |
| VAS14_18941 chaperonin GroEL                                               | O    | 835           | 22              |                                   |
| VAS14_07384 ompL_phopr porin-like protein L precursor                      | M    | 724           | 14              |                                   |
| VAS14_16921 putative cysteine synthase A                                   | E    | 638           | 13              |                                   |
| VAS14_19321 30S ribosomal protein S13                                      | J    | 617           | 15              |                                   |
| VAS14_05968 hypothetical protein                                           | /    | 603           | 13              |                                   |
| VAS14_07334 translation initiation factor IF-2                             | J    | 555           | 17              |                                   |
| VAS14_09604 acetyl-CoA acetyltransferase                                   | I    | 550           | 15              |                                   |
| VAS14_12874 hypothetical outer membrane protein OmpA                       | M    | 475           | 15              |                                   |
| VAS14_17071 flagellin                                                      | N    | 471           | 7               |                                   |
| VAS14_21577 phosphoglyceromutase                                           | G    | 460           | 13              |                                   |
| VAS14_19331 30S ribosomal protein S4                                       | J    | 434           | 10              |                                   |
| VAS14_18614 putative peptidyl-prolyl cis-trans isomerase                   | O    | 368           | 5               |                                   |
| VAS14_07339 transcription elongation factor NusA                           | K    | 349           | 8               |                                   |
| VAS14_19191 elongation factor Tu                                           | J    | 349           | 7               |                                   |
| VAS14_19306 50S ribosomal protein L15                                      | J    | 346           | 8               |                                   |
| VAS14_19266 50S ribosomal protein L24                                      | J    | 346           | 9               |                                   |
| VAS14_20601 50S ribosomal protein L19                                      | J    | 342           | 9               |                                   |
| VAS14_19206 50S ribosomal protein L3                                       | J    | 335           | 7               |                                   |
| VAS14_21011 (3R)-hydroxymyristoyl ACP dehydratase                          | I    | 318           | 7               |                                   |
| VAS14_17676 ferric uptake regulator                                        | P    | 310           | 6               |                                   |
| VAS14_18779 30S ribosomal protein S6                                       | J    | 280           | 5               |                                   |
| VAS14_01741 integration host factor alpha subunit                          | L    | 270           | 7               |                                   |
| VAS14_21177 30S ribosomal protein S7                                       | J    | 260           | 4               |                                   |
| VAS14_19341 50S ribosomal protein L17                                      | J    | 246           | 7               |                                   |
| VAS14_06688 ferredoxin                                                     | C    | 239           | 5               |                                   |
| VAS14_19296 putative ribosomal subunit protein S5                          | J    | 238           | 5               |                                   |
| VAS14_09599 acetoacetyl-CoA reductase                                      | IQR  | 231           | 6               |                                   |
| VAS14_21537 Hypothetical periplasmic protein CpxP                          | UNTP | 226           | 3               |                                   |
| VAS14_19231 30S ribosomal protein S19                                      | J    | 219           | 5               |                                   |
| VAS14_19511 single-strand DNA-binding protein                              | L    | 214           | 4               |                                   |
| VAS14_10584 3-deoxy-7-phosphoheptulonate synthase                          | E    | 200           | 4               |                                   |
| VAS14_19286 50S ribosomal protein L6                                       | J    | 196           | 4               |                                   |
| VAS14_17896 putative DNA-binding protein H-NS                              | R    | 195           | 7               |                                   |
| VAS14_07379 transcription elongation factor GreA                           | K    | 193           | 7               |                                   |
| VAS14_22954 hypothetical protein                                           | S    | 193           | 6               |                                   |
| VAS14_08295 50S ribosomal protein L21                                      | J    | 188           | 6               |                                   |
| VAS14_11709 putative lipoprotein                                           | /    | 184           | 4               |                                   |
| VAS14_03683 50S ribosomal protein L25                                      | J    | 181           | 4               |                                   |
| VAS14_05238 acyl carrier protein                                           | IQ   | 175           | 4               |                                   |
| VAS14_04158 arginine ABC transporter, periplasmic arginine-binding protein | ET   | 171           | 2               |                                   |
| VAS14_04998 elongation factor EF-2                                         | J    | 161           | 4               |                                   |
| VAS14_19911 cell division protein FtsZ                                     | D    | 161           | 4               |                                   |
| VAS14_19276 30S ribosomal protein S14                                      | J    | 159           | 2               |                                   |
| VAS14_03053 putative antioxidant                                           | O    | 153           | 4               |                                   |
| VAS14_18494 putative DNA topoisomerase (ATP-hydrolyzing)                   | L    | 151           | 5               |                                   |
| VAS14_10389 hypothetical protein                                           | S    | 148           | 4               |                                   |
| VAS14_20761 putative DNA damage-inducible protein in SOS regulon           | S    | 145           | 3               |                                   |
| VAS14_19201 30S ribosomal protein S10                                      | J    | 143           | 3               |                                   |
| VAS14_01951 hypothetical protein                                           | S    | 133           | 1               |                                   |
| VAS14_19176 50S ribosomal protein L11                                      | J    | 133           | 2               |                                   |
| VAS14_13794 hypothetical protein                                           | /    | 129           | 4               |                                   |
| VAS14_19281 30S ribosomal protein S8                                       | J    | 127           | 3               |                                   |
| VAS14_05243 3-ketoacyl-(acyl-carrier-protein) reductase                    | IQR  | 126           | 3               |                                   |
| VAS14_18946 co-chaperonin GroES                                            | O    | 124           | 3               |                                   |
| VAS14_15639 hypothetical protein                                           | /    | 122           | 2               |                                   |
| VAS14_06783 putative antioxidant, AhpC/Tsa family protein                  | O    | 117           | 4               |                                   |
| VAS14_19236 50S ribosomal protein L22                                      | J    | 116           | 6               |                                   |
| VAS14_20586 putative ribosomal protein S16                                 | J    | 109           | 5               |                                   |
| VAS14_16916 phosphocarrier protein HPr                                     | G    | 107           | 2               |                                   |
| VAS14_20496 recombinase A                                                  | L    | 103           | 3               |                                   |
| VAS14_16906 glucose-specific PTS system enzyme IIA component               | G    | 101           | 2               |                                   |

|                                                                              |    |     |   |        |
|------------------------------------------------------------------------------|----|-----|---|--------|
| VAS14_08695 thiol peroxidase                                                 | O  | 101 | 2 |        |
| VAS14_18834 RNA-binding protein Hfq                                          | R  | 99  | 3 |        |
| VAS14_19291 50S ribosomal protein L18                                        | J  | 98  | 3 |        |
| VAS14_21001 putative outer membrane protein OmpH                             | M  | 97  | 3 |        |
| VAS14_19786 50S ribosomal protein L13                                        | J  | 96  | 3 |        |
| VAS14_19241 30S ribosomal protein S3                                         | J  | 95  | 1 |        |
| VAS14_19016 putative acetyl-CoA carboxylase, biotin carboxyl carrier protein | I  | 94  | 1 |        |
| VAS14_16911 Putative phosphoenolpyruvate-proteinphosphotransferase           | U  | 91  | 1 |        |
| VAS14_21567 export protein SecB                                              | U  | 91  | 3 |        |
| VAS14_18769 30S ribosomal protein S18                                        | J  | 90  | 2 |        |
| VAS14_20951 methionine aminopeptidase                                        | J  | 89  | 2 |        |
| VAS14_08105 30S ribosomal protein S21                                        | J  | 89  | 3 |        |
| VAS14_06013 glyceraldehyde-3-phosphate dehydrogenase                         | G  | 84  | 2 |        |
| VAS14_08020 outer membrane channel precursor protein                         | MU | 81  | 2 |        |
| VAS14_00581 leucyl-tRNA synthetase                                           | J  | 81  | 1 |        |
| VAS14_22487 ATP synthase subunit B                                           | C  | 78  | 1 |        |
| VAS14_19211 50S ribosomal protein L4                                         | J  | 78  | 2 |        |
| VAS14_08120 RNA polymerase sigma factor                                      | K  | 77  | 2 |        |
| VAS14_07629 hypothetical protein                                             | O  | 75  | 2 |        |
| VAS14_00681 bacterioferritin comigratory protein                             | O  | 74  | 1 |        |
| VAS14_14989 transaldolase                                                    | G  | 74  | 2 |        |
| VAS14_18916 elongation factor P                                              | J  | 72  | 2 |        |
| VAS14_08310 malate dehydrogenase                                             | C  | 71  | 1 |        |
| VAS14_06208 ATP-dependent protease ATP-binding subunit                       | O  | 70  | 2 |        |
| VAS14_16581 serine hydroxymethyltransferase                                  | E  | 69  | 2 | VLDICK |
| VAS14_21222 peptidyl-prolyl cis-trans isomerase                              | O  | 68  | 2 |        |
| VAS14_14319 hypothetical protein                                             |    | 68  | 1 |        |
| VAS14_20516 carbon storage regulator                                         | T  | 66  | 1 |        |
| VAS14_07970 Putative translation initiation inhibitor                        | J  | 65  | 1 |        |
| VAS14_18764 50S ribosomal protein L9                                         | J  | 65  | 1 |        |
| VAS14_21076 putative lipoprotein YaeC                                        | P  | 64  | 1 |        |
| VAS14_04723 putative heat shock protein HslJ                                 | O  | 64  | 1 |        |
| VAS14_01246 hypothetical protein                                             | P  | 64  | 2 |        |
| VAS14_17761 succinyl-CoA synthetase subunit beta                             | C  | 59  | 2 |        |
| VAS14_21182 30S ribosomal protein S12                                        | J  | 58  | 1 |        |
| VAS14_08340 inorganic pyrophosphatase                                        | C  | 57  | 1 |        |
| VAS14_20201 glutathione synthetase                                           | HJ | 56  | 1 |        |
| VAS14_05963 hypothetical outer membrane protein OmpA                         | M  | 55  | 1 |        |
| VAS14_16399 peptide chain release factor 1                                   | J  | 54  | 1 |        |
| VAS14_19221 50S ribosomal protein L2                                         | J  | 54  | 1 |        |
| VAS14_22392 50S ribosomal protein L34                                        | J  | 53  | 2 |        |
| VAS14_22197 peptide ABC transporter, periplasmic peptide-binding protein     | E  | 52  | 1 |        |
| VAS14_06198 putative bacterial nucleoid DNA-binding protein                  | L  | 51  | 1 |        |
| VAS14_17571 hypothetical protein                                             | S  | 51  | 1 |        |
| VAS14_02181 hypothetical protein                                             | /  | 50  | 1 |        |
| VAS14_07684 putative formate acetyl transferase-related protein              | R  | 48  | 1 |        |
| VAS14_17541 OmpH porin-like protein H precursor                              | M  | 47  | 2 |        |
| VAS14_21362 shikimate kinase I                                               | E  | 47  | 1 |        |
| VAS14_08290 50S ribosomal protein L27                                        | J  | 46  | 1 |        |
| VAS14_20236 phosphoglycerate kinase                                          | G  | 45  | 1 |        |
| VAS14_21667 putative ribosomal protein L28                                   | J  | 45  | 1 |        |
| VAS14_06708 putative NifU-related protein                                    | C  | 43  | 1 |        |
| VAS14_21277 putative cyclic AMP receptor protein                             | T  | 43  | 1 |        |
| VAS14_00453 uracil phosphoribosyltransferase                                 | F  | 40  | 1 |        |
| VAS14_07945 hypothetical protein                                             | S  | 40  | 1 |        |
| VAS14_18824 putative Membrane protease subunits                              | O  | 39  | 1 |        |
| VAS14_22552 branched-chain amino acid aminotransferase                       | EH | 37  | 1 |        |
| VAS14_21457 50S ribosomal protein L31                                        | J  | 36  | 1 |        |
| VAS14_19256 30S ribosomal protein S17                                        | J  | 35  | 1 |        |
| VAS14_11494 hypothetical protein                                             | /  | 34  | 1 |        |
| VAS14_22507 ATP synthase subunit B                                           | C  | 34  | 1 |        |
| VAS14_14879 hypothetical protein                                             | S  | 34  | 1 |        |
| VAS14_18744 hypothetical protein                                             | M  | 34  | 1 |        |
| VAS14_20556 glutamate--cysteine ligase                                       | H  | 33  | 1 |        |
| VAS14_03193 hypothetical protein                                             | /  | 33  | 1 |        |
| VAS14_07449 putative ribosomal protein S20                                   | J  | 33  | 1 |        |
| VAS14_07314 polyribonucleotide nucleotidyltransferase                        | J  | 33  | 1 |        |
| VAS14_17596 adenylate kinase                                                 | S  | 33  | 1 |        |
| VAS14_04308 hypothetical protein                                             | S  | 33  | 1 |        |
| VAS14_07649 hypothetical O-methyltransferase                                 | R  | 32  | 1 | LLQLSK |

\*Nb of peptides: number of non-redundant peptides, identification using Mascot. (Mass spectrometry: short run)
