# Supplementary material for: Shotgun Redox Proteomics: Identification and Quantitation of Carbonylated Proteins in the UVB-Resistant Marine Bacterium, Photobacterium angustum S14
Source: PubMed Central journal article supplement (PMC3706606; doi:10.1371/journal.pone.0068112), 2013-07-09
Supplement: pone.0068112.s002.pdf [file pone.0068112.s002.pdf]

**Table S2.** Carbonyl proteins labeled with biotin identified from cells exposed to dark treatment (58 proteins).

| Protein name                                                 | COG | Protein score | *Nb of peptides | Sequence of carbonylated peptides |
|--------------------------------------------------------------|-----|---------------|-----------------|-----------------------------------|
| VAS14_20961 elongation factor Ts                             | J   | 2333          | 42              |                                   |
| VAS14_06218 trigger factor                                   | O   | 2209          | 44              |                                   |
| VAS14_07124 molecular chaperone DnaK                         | O   | 1845          | 37              |                                   |
| VAS14_12874 hypothetical outer membrane protein OmpA         | M   | 1324          | 34              |                                   |
| VAS14_09359 cold shock protein                               | K   | 1071          | 13              |                                   |
| VAS14_19171 50S ribosomal protein L1                         | J   | 1004          | 24              |                                   |
| VAS14_18544 30S ribosomal protein S1                         | J   | 941           | 22              |                                   |
| VAS14_17071 flagellin                                        | N   | 937           | 16              |                                   |
| VAS14_07384 ompL_phopr porin-like protein L precursor        | M   | 699           | 14              |                                   |
| VAS14_05968 hypothetical protein                             | /   | 555           | 11              |                                   |
| VAS14_16916 phosphocarrier protein HPr                       | G   | 499           | 13              |                                   |
| VAS14_18614 putative peptidyl-prolyl cis-trans isomerase     | O   | 484           | 8               |                                   |
| VAS14_19161 50S ribosomal protein L7/L12                     | J   | 461           | 12              |                                   |
| VAS14_04158 arginine ABC transporter                         | ET  | 443           | 9               |                                   |
| VAS14_19321 30S ribosomal protein S13                        | J   | 417           | 8               |                                   |
| VAS14_09609 hypothetical protein                             | /   | 412           | 10              |                                   |
| VAS14_18779 30S ribosomal protein S6                         | J   | 407           | 5               |                                   |
| VAS14_19266 50S ribosomal protein L24                        | J   | 394           | 10              |                                   |
| VAS14_08290 50S ribosomal protein L27                        | J   | 247           | 9               |                                   |
| VAS14_20601 50S ribosomal protein L19                        | J   | 231           | 4               |                                   |
| VAS14_11709 putative lipoprotein                             | /   | 211           | 4               |                                   |
| VAS14_19336 DNA-directed RNA polymerase alpha subunit        | K   | 173           | 4               |                                   |
| VAS14_19281 30S ribosomal protein S8                         | J   | 153           | 6               |                                   |
| VAS14_19206 50S ribosomal protein L3                         | J   | 152           | 3               |                                   |
| VAS14_16906 glucose-specific PTS system enzyme IIA component | G   | 132           | 2               |                                   |
| VAS14_18946 co-chaperonin GroES                              | O   | 128           | 3               |                                   |
| VAS14_18764 50S ribosomal protein L9                         | J   | 119           | 2               |                                   |
| VAS14_05238 acyl carrier protein                             | IQ  | 115           | 2               |                                   |
| VAS14_04308 hypothetical protein                             | S   | 98            | 2               |                                   |
| VAS14_07329 ribosome-binding factor A                        | J   | 89            | 1               |                                   |
| VAS14_08295 50S ribosomal protein L21                        | J   | 88            | 1               |                                   |
| VAS14_04258 putative amino acid ABC transporter              | ET  | 87            | 1               |                                   |
| VAS14_01951 hypothetical protein                             | S   | 77            | 1               |                                   |
| VAS14_22197 peptide ABC transporter                          | E   | 77            | 1               |                                   |
| VAS14_17896 putative DNA-binding protein H-NS                | R   | 74            | 2               |                                   |
| VAS14_19286 50S ribosomal protein L6                         | J   | 72            | 3               |                                   |
| VAS14_18051 hypothetical protein                             | S   | 70            | 1               |                                   |
| VAS14_07970 Putative translation initiation inhibitor        | J   | 63            | 1               |                                   |
| VAS14_19511 single-strand DNA-binding protein                | L   | 61            | 1               |                                   |
| VAS14_20971 ribosome releasing factor                        | J   | 60            | 1               |                                   |
| VAS14_16921 putative cysteine synthase A                     | E   | 58            | 1               |                                   |
| VAS14_19191 elongation factor Tu                             | J   | 54            | 1               |                                   |
| VAS14_14319 hypothetical protein                             | /   | 53            | 1               |                                   |
| VAS14_19306 50S ribosomal protein L15                        | J   | 51            | 1               |                                   |
| VAS14_06198 putative bacterial nucleoid DNA-binding protein  | L   | 49            | 1               |                                   |
| VAS14_05653 putative superoxide dismutase                    | P   | 48            | 1               |                                   |

|                                                              |    |    |   |         |
|--------------------------------------------------------------|----|----|---|---------|
| VAS14_07945 hypothetical protein                             | S  | 45 | 1 |         |
| VAS14_08455 diadenosine tetraphosphatase                     | R  | 40 | 1 |         |
| VAS14_08695 thiol peroxidase                                 | O  | 39 | 1 |         |
| VAS14_11299 putative glycine betaine-binding ABC transporter | E  | 38 | 1 |         |
| VAS14_19331 30S ribosomal protein S4                         | J  | 38 | 1 |         |
| VAS14_19341 50S ribosomal protein L17                        | J  | 37 | 1 |         |
| VAS14_21577 phosphoglyceromutase                             | G  | 35 | 1 |         |
| VAS14_17541 OmpH porin-like protein H precursor              | M  | 34 | 1 |         |
| VAS14_03193 hypothetical protein                             | /  | 34 | 1 |         |
| VAS14_06493 putative amino acid ABC transporter              | ET | 34 | 2 |         |
| VAS14_19166 50S ribosomal protein L10                        | J  | 32 | 1 |         |
| VAS14_07649 hypothetical O-methyltransferase                 | R  | 30 | 1 | LLLQLSK |

\* Nb of peptides: number of non-redundant peptides, identification using Mascot. (Mass spectrometry:short run)
