# Supplementary material for: Shotgun Redox Proteomics: Identification and Quantitation of Carbonylated Proteins in the UVB-Resistant Marine Bacterium, Photobacterium angustum S14
Source: PubMed Central journal article supplement (PMC3706606; doi:10.1371/journal.pone.0068112), 2013-07-09
Supplement: pone.0068112.s003.pdf [file pone.0068112.s003.pdf]

**Table S3.** Carbonylated proteins identified after labeling with DNPH (62 non-redundant proteins).

| Carbonylated proteins only identified in UVB condition*           |                                                           |
|-------------------------------------------------------------------|-----------------------------------------------------------|
| VAS14_00841                                                       | putative pyruvate kinase II                               |
| VAS14_01896                                                       | putative DnaK-related protein                             |
| VAS14_05433                                                       | isocitrate dehydrogenase                                  |
| VAS14_06363                                                       | glycosyl transferase                                      |
| VAS14_07339                                                       | transcription elongation factor NusA                      |
| VAS14_07344                                                       | hypothetical protein                                      |
| VAS14_07404                                                       | carbamoyl-phosphate synthase large subunit                |
| VAS14_07699                                                       | bifunctional aspartokinase I / homoserine dehydrogenase I |
| VAS14_07734                                                       | putative glutamate synthase, large subunit                |
| VAS14_09609                                                       | hypothetical protein                                      |
| VAS14_15214                                                       | ATP synthase subunit B                                    |
| VAS14_16399                                                       | peptide chain release factor 1                            |
| VAS14_16526                                                       | bifunctional GMP synthase/glutamine amidotransferase      |
| VAS14_16581                                                       | serine hydroxymethyltransferase                           |
| VAS14_18544                                                       | 30S ribosomal protein S1                                  |
| VAS14_19166                                                       | 50S ribosomal protein L10                                 |
| VAS14_19336                                                       | DNA-directed RNA polymerase alpha subunit                 |
| VAS14_19626                                                       | putative MreB, Actin-like ATPase                          |
| VAS14_19926                                                       | translocase                                               |
| VAS14_20221                                                       | S-adenosylmethionine synthetase                           |
| VAS14_20256                                                       | Phosphoglycerate dehydrogenase                            |
| VAS14_21322                                                       | tryptophanyl-tRNA synthetase                              |
| VAS14_21427                                                       | phosphoenolpyruvate carboxylase                           |
| VAS14_21532                                                       | 6-phosphofructokinase                                     |
| VAS14_22357                                                       | DNA gyrase subunit B                                      |
| VAS14_23029                                                       | phosphoenolpyruvate carboxykinase                         |
| Carbonylated proteins only identified in Dark condition*          |                                                           |
| VAS14_01951                                                       | hypothetical protein                                      |
| VAS14_04153                                                       | putative arginine ABC transporter, ATP-binding protein    |
| VAS14_05363                                                       | seryl-tRNA synthetase                                     |
| VAS14_05498                                                       | putative oligopeptide ABC transporter                     |
| VAS14_06493                                                       | putative amino acid ABC transporter                       |
| VAS14_07124                                                       | molecular chaperone DnaK                                  |
| VAS14_10219                                                       | phosphoenolpyruvate synthase                              |
| VAS14_17071                                                       | flagellin                                                 |
| VAS14_18001                                                       | putative alcohol dehydrogenase/acetaldehyde dehydrogenase |
| VAS14_18764                                                       | 50S ribosomal protein L9                                  |
| VAS14_19286                                                       | 50S ribosomal protein L6                                  |
| VAS14_19331                                                       | 30S ribosomal protein S4                                  |
| VAS14_21207                                                       | putative FKBP-type peptidyl-prolyl cis-trans isomerase 1  |
| VAS14_21577                                                       | phosphoglyceromutase                                      |
| VAS14_22492                                                       | ATP synthase subunit D                                    |
| VAS14_22497                                                       | ATP synthase subunit A                                    |
| VAS14_22552                                                       | branched-chain amino acid aminotransferase                |
| Carbonylated proteins identified in both UVB and Dark conditions* |                                                           |
| VAS14_04158                                                       | arginine ABC transporter                                  |
| VAS14_04998                                                       | elongation factor EF-2                                    |
| VAS14_05968                                                       | hypothetical protein                                      |
| VAS14_06513                                                       | formate acetyltransferase                                 |
| VAS14_07384                                                       | ompL_phopr porin-like protein L precursor                 |
| VAS14_09599                                                       | acetoacetyl-CoA reductase                                 |
| VAS14_09604                                                       | acetyl-CoA acetyltransferase                              |
| VAS14_10584                                                       | 3-deoxy-7-phosphoheptulonate synthase                     |
| VAS14_14994                                                       | transketolase                                             |
| VAS14_18809                                                       | adenylosuccinate synthetase                               |
| VAS14_18941                                                       | chaperonin GroEL                                          |
| VAS14_19156                                                       | DNA-directed RNA polymerase beta subunit                  |
| VAS14_19191                                                       | elongation factor Tu                                      |
| VAS14_19296                                                       | putative ribosomal subunit protein S5                     |
| VAS14_19986                                                       | putative Pyruvate dehydrogenase complex                   |
| VAS14_20006                                                       | aconitate hydratase                                       |
| VAS14_20236                                                       | phosphoglycerate kinase                                   |
| VAS14_22247                                                       | ketol-acid reductoisomerase                               |
| VAS14_22994                                                       | glutamine synthetase                                      |

\* Protein identification using Protein Pilot / Mass spectrometry: long run.
